# Supplementary material for: Construction of well-defined difluoromethylthio-containing amphiphilic homopolymers by RAFT polymerization
Source: Royal Society of Chemistry journal article supplement (doi:10.1039/d0py01234c), 2020-01-01
Supplement: d0py01234c1.pdf [file d0py01234c1.pdf]

**Supporting information for**  
**Construction of Well-Defined Difluoromethylthio-Containing**  
**Amphiphilic Homopolymers by RAFT Polymerization**

*Haoyu Liu, Sen Zhang, Xiaoyu Huang,\* Aishun Ding, Guolin Lu\**

Key Laboratory of Synthetic and Self-Assembly Chemistry for Organic Functional Molecules, Center for Excellence in Molecular Synthesis, Shanghai Institute of Organic Chemistry, University of Chinese Academy of Sciences, Chinese Academy of Sciences, 345 Lingling Road, Shanghai 200032, People's Republic of China.

\* To whom correspondence should be addressed, E-mail: luguolin@mail.sioc.ac.cn  
(Tel: +86-21-54925546, Fax: +86-21-64166128), xyhuang@mail.sioc.ac.cn (Tel:  
+86-21-54925310, Fax: +86-21-64166128).

## Synthesis of 3-difluoromethylthio-1-propylamine

The key intermediate, 3-difluoromethylthio-1-propylamine, was prepared from *N*-(3-bromopropyl)phthalimide via three steps (**Scheme S1**) as below.

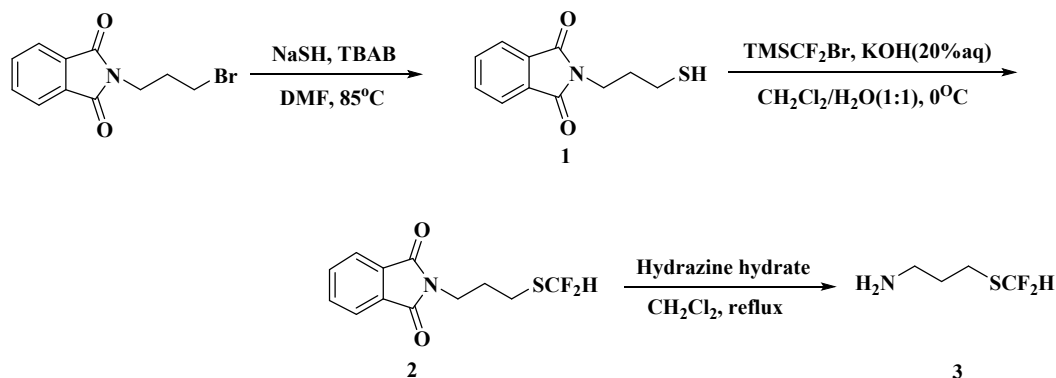

**Scheme S1.** Synthetic route of 3-difluoromethylthio-1-propylamine.

*N*-(3-bromopropyl)phthalimide (100.0 g, 373.1 mmol), NaHS (41.8 g, 74.6 mmol) and 3-difluoromethylthio-1-propylamine (62.7 g, 298.6 mmol) were stirred in *N,N*-dimethylformamide (DMF, 500 mL) at room temperature for 12 h followed by adding water (150 mL) to quench the reaction. The mixture was extracted with dichloromethane (DCM, 100 mL×3), and the organic phase was then collected and washed with water (200 mL×3). After rotary evaporation, the crude product was purified by flash column chromatography on silica gel (eluent: EtOAc/*n*-hexane, v:v = 1:5), affording 45.6 g (55.1%) of *N*-(3-mercaptopropyl)phthalimide **1** as a white crystal. <sup>1</sup>H NMR (CDCl<sub>3</sub>): δ (ppm): 7.84, 7.71 (4H, phenyl), 3.80 (2H, NCH<sub>2</sub>CH<sub>2</sub>CH<sub>2</sub>SH), 2.53 (2H, NCH<sub>2</sub>CH<sub>2</sub>CH<sub>2</sub>SH), 1.98 (2H, NCH<sub>2</sub>CH<sub>2</sub>CH<sub>2</sub>SH), 1.58 (1H, NCH<sub>2</sub>CH<sub>2</sub>CH<sub>2</sub>SH). <sup>13</sup>C NMR (CDCl<sub>3</sub>): δ (ppm): 168.3, 133.9, 132.0, 123.2, 36.3, 32.6, 21.8. FT-IR: ν(cm<sup>-1</sup>): 3451, 2940, 2554, 2081, 1761, 1693, 1467, 1435. ESI-MS *m/z*: 222.06 [M+H]<sup>+</sup>. HR-MS (ESI) *m/z*: [M+H]<sup>+</sup>, calcd for C<sub>11</sub>H<sub>12</sub>O<sub>2</sub>NS<sup>+</sup> 222.0583, Found 222.0582.

*N*-(3-Mercaptopropyl)phthalimide **1** (16.0 g, 72.1 mmol) and KOH (24.2 g, 96.9 mL, 20% aq) were first added to 200 mL of DCM and the solution was cooled to 0°C. TMSCF<sub>2</sub>Br (22.4 mL, 144.2 mmol) in 50 mL of DCM was then added dropwise within 30 min under stirring. The reaction lasted 1 h and was quenched by water. The organic phase was collected and washed with water (200 mL×3). After rotary evaporation, the crude product was purified by column chromatography on silica gel (eluent: *n*-hexane), affording 10.2 g (54.3%) of *N*-(3-difluoromethylthiopropyl)-phthalimide **2** as a white solid. <sup>1</sup>H NMR (CDCl<sub>3</sub>): δ (ppm): 7.84, 7.72 (4H, phenyl), 6.80 (1H, NCH<sub>2</sub>CH<sub>2</sub>CH<sub>2</sub>SCF<sub>2</sub>H), 3.80 (2H, NCH<sub>2</sub>CH<sub>2</sub>CH<sub>2</sub>SCF<sub>2</sub>H), 2.82 (2H, NCH<sub>2</sub>CH<sub>2</sub>CH<sub>2</sub>SCF<sub>2</sub>H), 2.06 (2H, NCH<sub>2</sub>CH<sub>2</sub>CH<sub>2</sub>SCF<sub>2</sub>H). <sup>13</sup>C NMR (CDCl<sub>3</sub>): δ (ppm): 168.2, 134.1, 131.9, 123.3, 120.5 (SCF<sub>2</sub>H), 36.6, 29.3, 24.5. <sup>19</sup>F NMR (CDCl<sub>3</sub>): δ (ppm): -92.74 (2F, SCF<sub>2</sub>H). FT-IR: ν (cm<sup>-1</sup>): 3459, 2942, 1769, 1701, 1612, 1464, 1437. ESI-MS *m/z*: 294.04 [M+Na]<sup>+</sup>. HR-MS (ESI) *m/z*: [M+Na]<sup>+</sup>, calcd for C<sub>12</sub>H<sub>11</sub>O<sub>2</sub>NF<sub>2</sub>NaS<sup>+</sup> 294.0371, Found 294.0372.

*N*-(3-difluoromethylthiopropyl)phthalimide **2** (8.60 g, 31.7 mmol) and hydrazine hydrate (50 mL, 20 eq) were refluxed in DCM (100 mL) at 75°C for 8 h. The mixture was washed by dichloromethane. The solution was cooled to room temperature and filtered. The obtained white solid was washed with DCM (50 mL×3) followed by drying over anhydrous Na<sub>2</sub>SO<sub>4</sub>. After rotary evaporation, the residue was distilled at 50°C under reduced pressure to give 3.00 g (67.1%) of 3-difluoromethylthio-1-propylamine **3** as a colorless liquid. <sup>1</sup>H NMR (CD<sub>3</sub>OD): δ (ppm): 7.01 (1H, NH<sub>2</sub>CH<sub>2</sub>CH<sub>2</sub>CH<sub>2</sub>SCF<sub>2</sub>H), 2.83 (2H, NH<sub>2</sub>CH<sub>2</sub>CH<sub>2</sub>CH<sub>2</sub>SCF<sub>2</sub>H), 2.70 (2H,

$\text{NH}_2\text{CH}_2\text{CH}_2\text{CH}_2\text{SCF}_2\text{H}$ ), 1.79 (2H,  $\text{NH}_2\text{CH}_2\text{CH}_2\text{CH}_2\text{SCF}_2\text{H}$ ).  $^{13}\text{C}$  NMR ( $\text{CD}_3\text{OD}$ ):  $\delta$  (ppm): 120.7 ( $\text{SCF}_2\text{H}$ ), 40.6, 33.4, 24.5.  $^{19}\text{F}$  NMR ( $\text{CD}_3\text{OD}$ ):  $\delta$  (ppm): -94.44 (2F,  $\text{SCF}_2\text{H}$ ). FT-IR:  $\nu$  ( $\text{cm}^{-1}$ ): 2936, 2863, 1653, 1591, 1442, 1325. ESI-MS  $m/z$ : 142.05  $[\text{M}+\text{H}]^{+1}$ . HR-MS (ESI)  $m/z$ :  $[\text{M}+\text{H}]^{+1}$ , calcd for  $\text{C}_4\text{H}_{10}\text{O}_2\text{NF}_2\text{S}^{+1}$  142.0497, Found 142.0496.

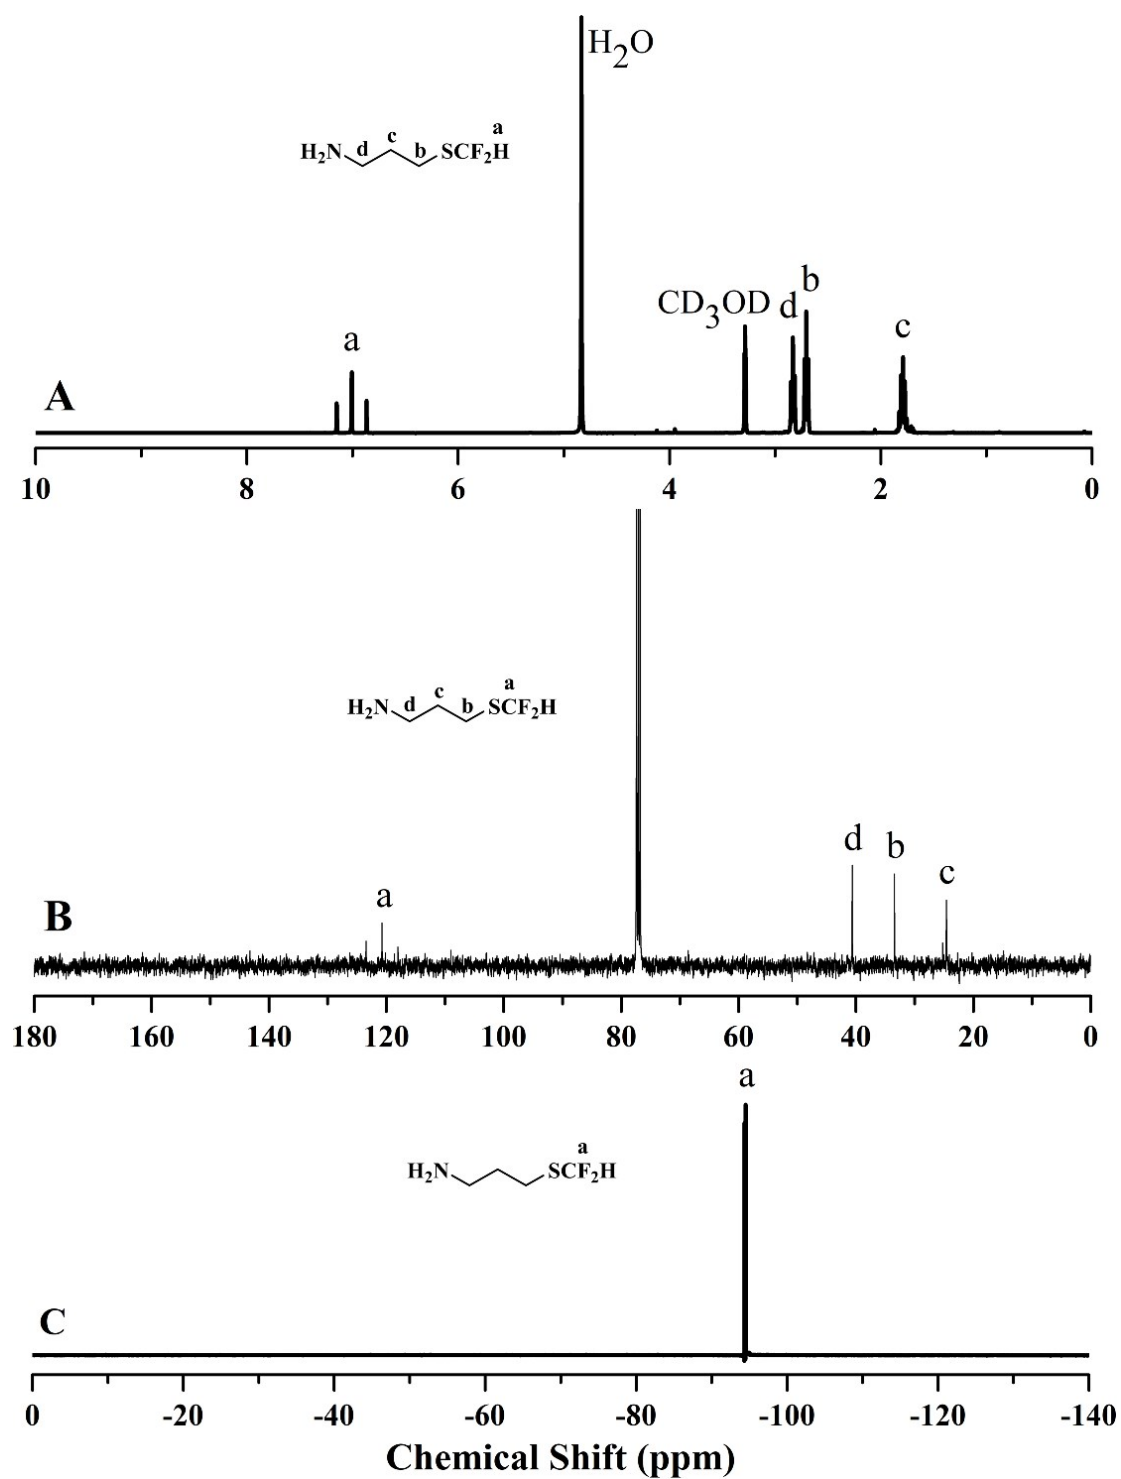

**Figure S1.**  $^1\text{H}$  (A),  $^{13}\text{C}$  (B) and  $^{19}\text{F}$  (C) NMR spectra of 3-difluorothiomeethyl-1-propylamine in  $\text{CD}_3\text{OD}$ .

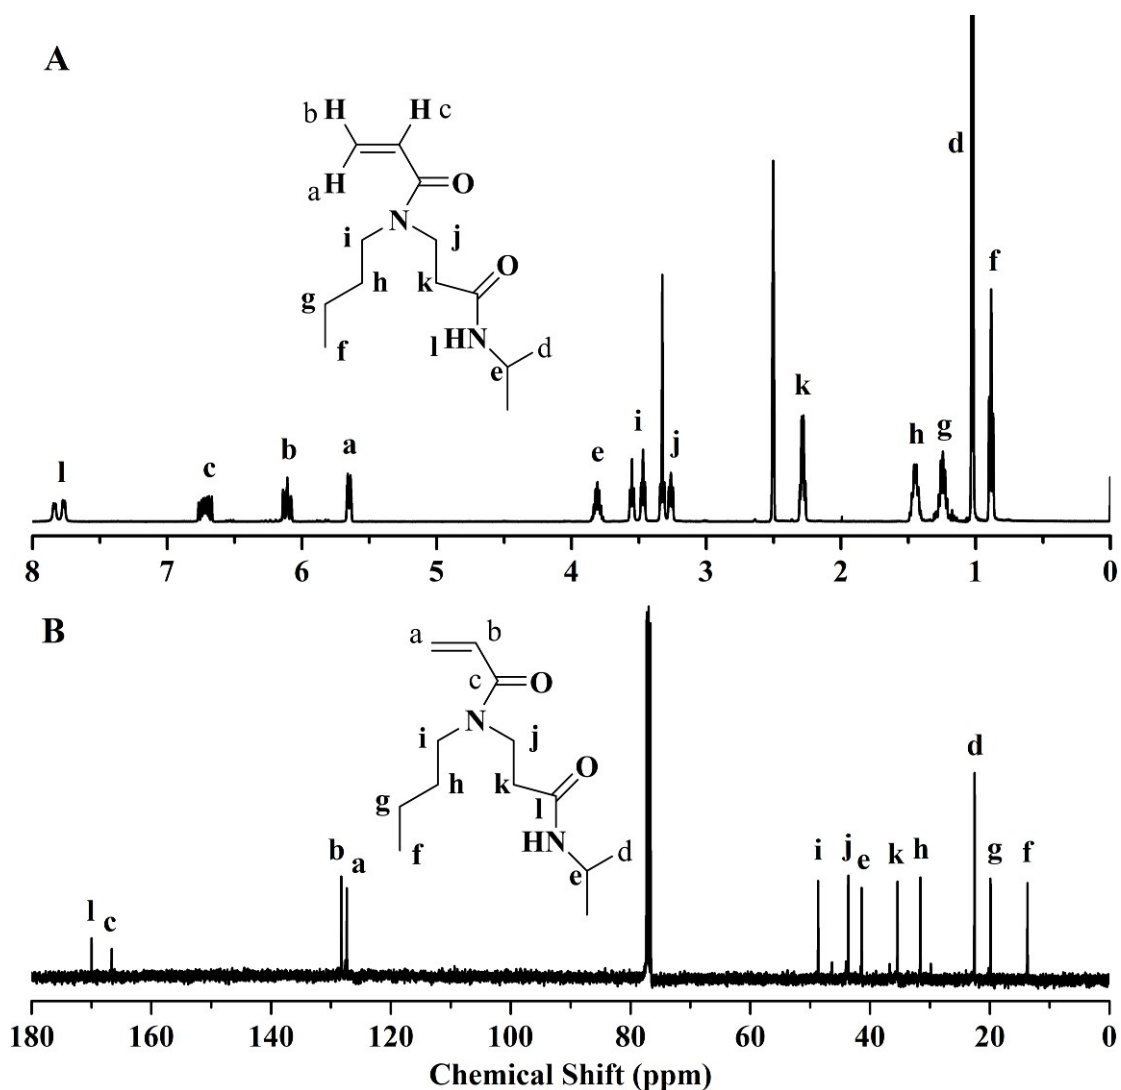

**Figure S2.** (A)  $^1\text{H}$  (in  $\text{DMSO}-d_6$ ) and (B)  $^{13}\text{C}$  (in  $\text{CDCl}_3$ ) NMR spectra of Bu-NIPAM-AM.

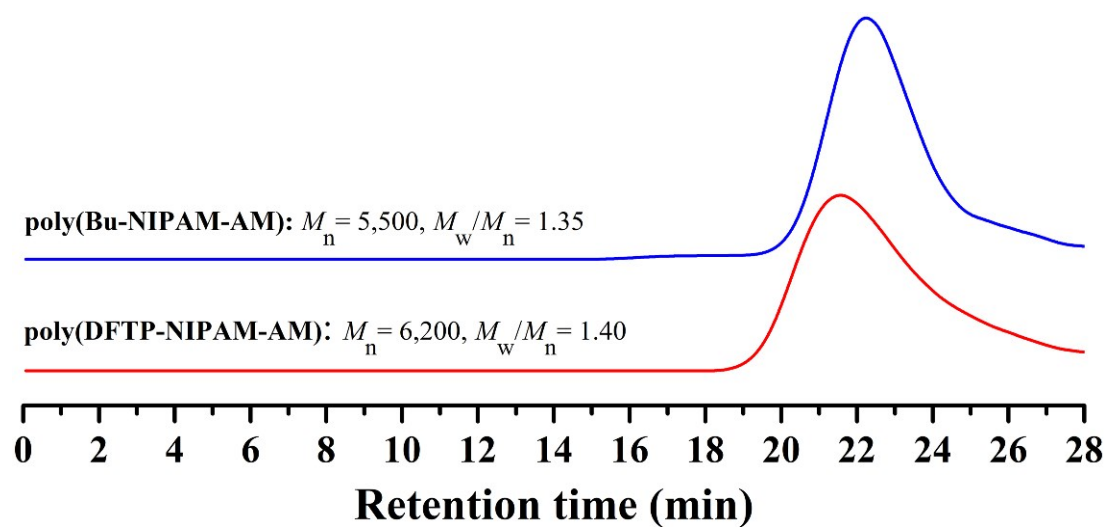

**Figure S3.** GPC curves of poly(DFTP-NIPAM-AM) and poly(Bu-NIPAM-AM) in THF.

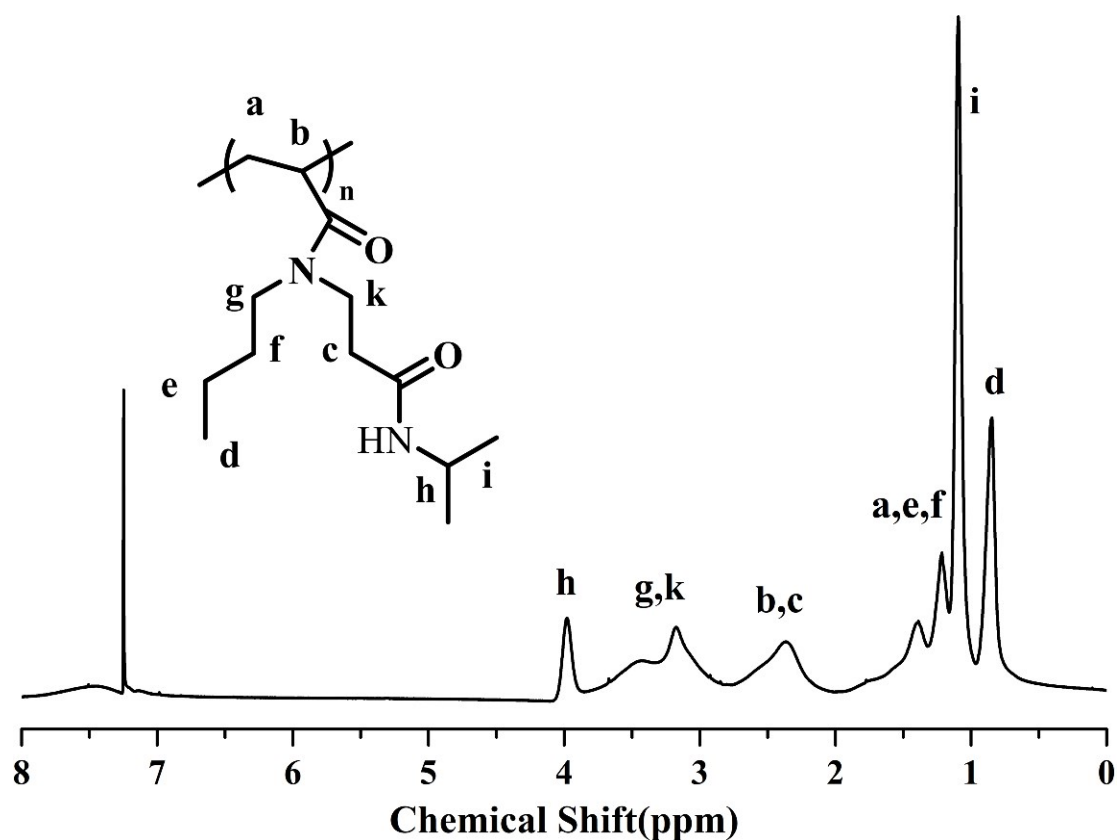

**Figure S4.**  $^1\text{H}$  NMR spectrum of poly(Bu-NIPAM-AM) in  $\text{CDCl}_3$ .

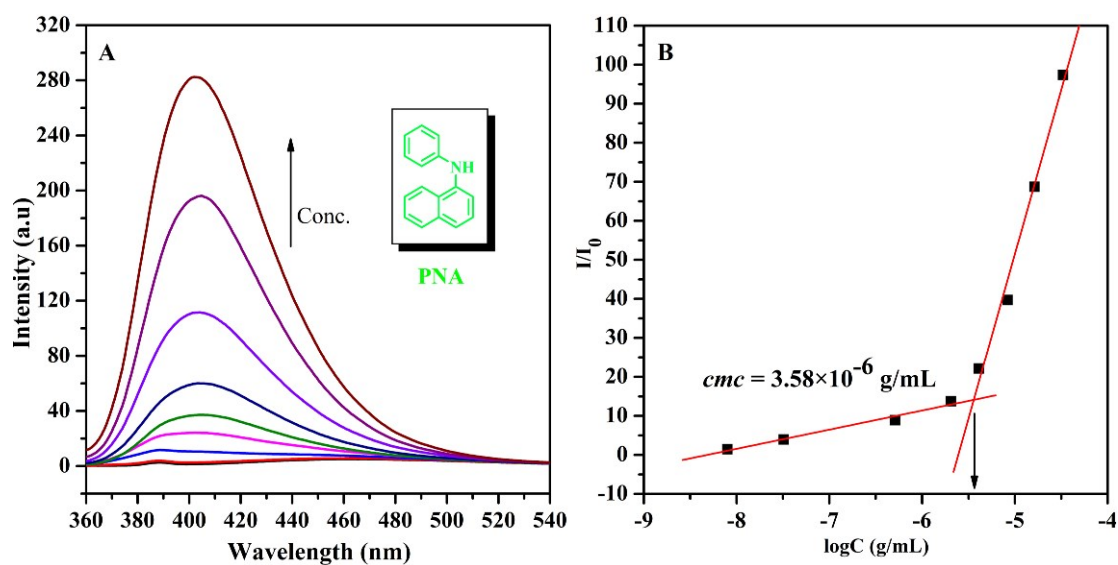

**Figure S5.** (A) Fluorescence emission spectra of PNA in the aqueous solution of poly(Bu-NIPAM-AM) homopolymer ( $[\text{PNA}] = 2 \times 10^{-6} \text{ mol/L}$ ) and (B) dependence of fluorescence intensity ratio of PNA emission band at 418 nm on the concentration of poly(Bu-NIPAM-AM) homopolymer.
